# Supplementary material for: Satisfaction in Population-Based Cancer Screening in a Chinese Rural High-Risk Population: The Yangzhong Early Diagnosis and Treatment of Upper Gastrointestinal Cancer
Source: Research Square preprint supplement (doi:10.21203/rs.3.rs-858010/v1), 2021-09-14
Supplement: Supplementary file 1 [file a1d5223f15c5cf00ffee4a77.docx]

| Table 1 Components of the original modified SERVQUAL |
| --- |
| 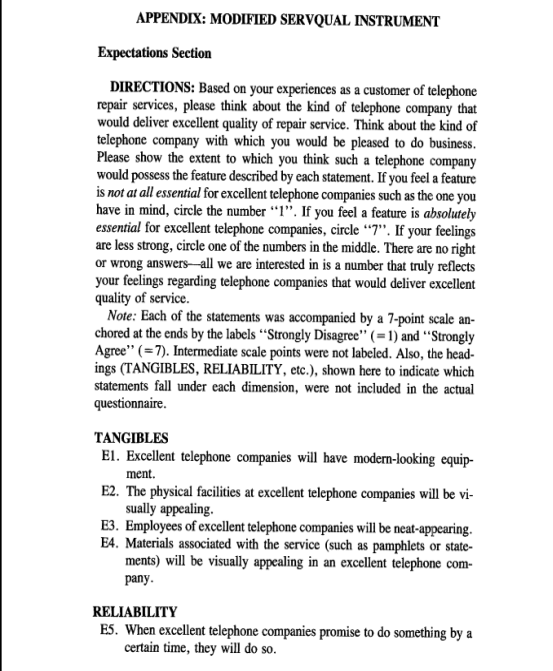 |

| Table 1 Continued |
| --- |
| 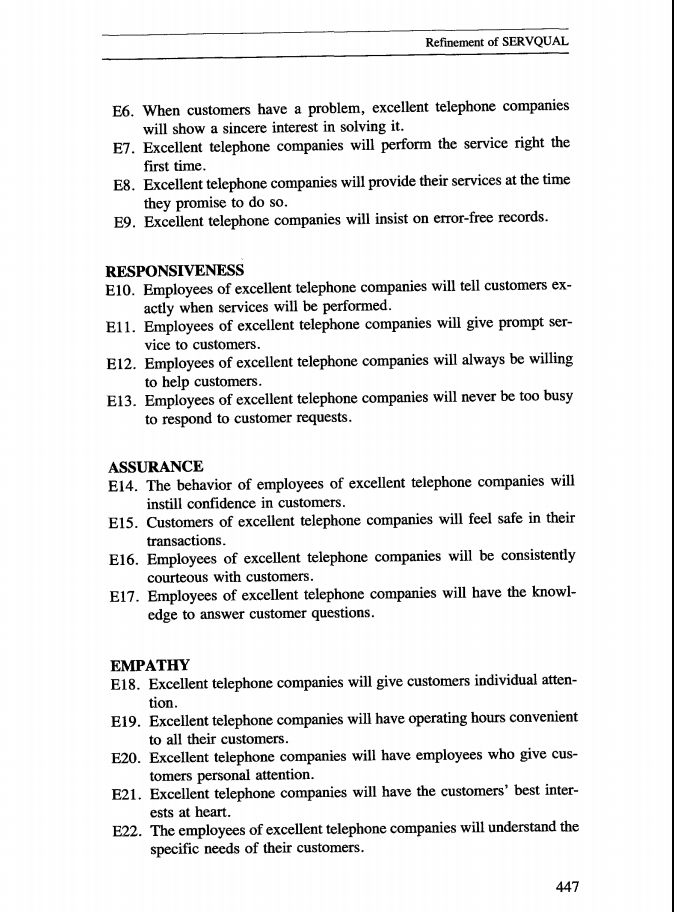 |

| Table 1 Continued |
| --- |
| 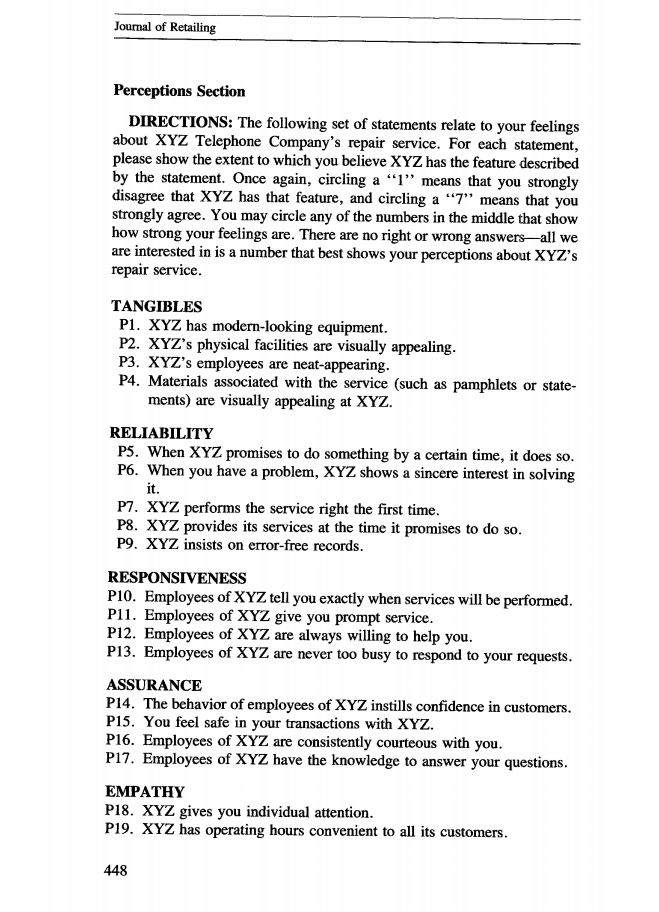 |

| Table 1 Continued |
| --- |
| 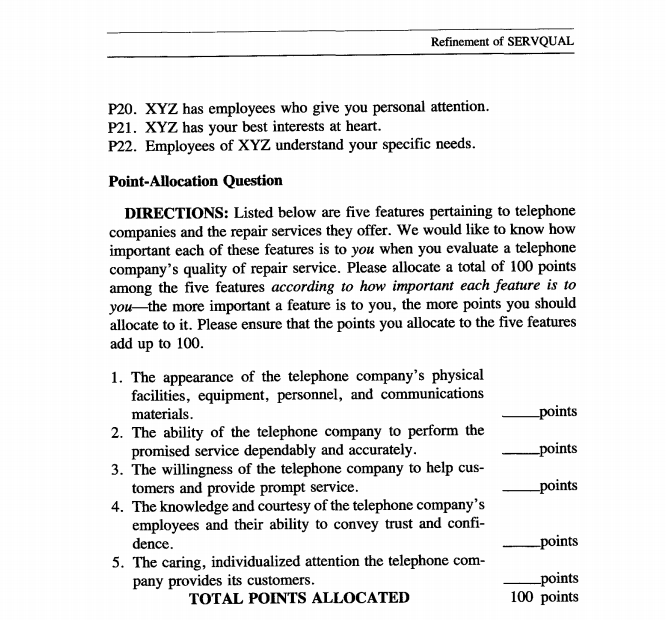 |

| Table 2 Items of the SERVQUAL scale questionnaire used in our study | |
| --- | --- |
| Expectation section | Perception section |
| **Tangibles** (physical facilities, equipment and appearance of personnel) | **Tangibles** (physical facilities, equipment and appearance of personnel) |
| E1. The Screening Centre will have modern-looking equipment. | P1. The Screening Centre has have modern-looking equipment. |
| E2. The Screening Centre‘s physical facilities will be visually appealing. | P2. The Screening Centre‘s physical facilities are visually appealing. |
| E3. The Screening Centre‘s workers will be neat-appearing. | P3. The Screening Centre‘s workers are neat-appearing. |
| E4. Materials associated with the service will be visually appealing. | P4. Materials associated with the service are visually appealing. |
| **Reliability** (ability to perform the promised service dependably and accurately) | **Reliability** (ability to perform the promised service dependably and accurately) |
| E5. When the Screening Centre promises to do something by a certain time, it will do so. | E5. When the Screening Centre promises to do something by a certain time, it does so. |
| E6. When the patient or you have a problem, the Screening Centre will show a sincere interest in solving it. | E6. When the patient or you have a problem, the Screening Centre shows a sincere interest in solving it. |
| E7. The Screening Centre will perform the service right the first time. | E7. The Screening Centre performs the service right the first time. |
| E8. The Screening Centre will provide its service at the time it promises to do so. | E8. The Screening Centre provides its service at the time it promises to do so. |
| E9. The Screening Centre will insist on error-free records. | E9. The Screening Centre insists on error-free records. |
| **Responsiveness** (willingness to help patients and families and provide prompt service) | **Responsiveness** (willingness to help patients and families and provide prompt service) |
| E10. Workers at the Screening Centre will tell you exactly when the care will be performed. | E10. Workers at the Screening Centre tell you exactly when the care will be performed. |
| E11. Workers at the Screening Centre will give the patient prompt care. | E11. Workers at the Screening Centre give the patient prompt care. |
| E12. Workers at the Screening Centre will always be willing to help you and the patient. | E12. Workers at the Screening Centre are always willing to help you and the patient. |
| E13. Workers at the Screening Centre will never be too busy to respond to the patient’s or your requests. | E13. Workers at the Screening Centre are never too busy to respond to the patient’s or your requests. |
| **Assurance** (including competence, courtesy, credibility and security) | **Assurance** (including competence, courtesy, credibility and security) |
| E14. The behavior of the workers at the ICU will instill confidence in the patient and the family. | E14. The behavior of the workers at the ICU instills confidence in the patient and the family. |
| E15. You will feel safe for the patient’s care by the Screening Centre. | E15. You feel safe for the patient’s care by the Screening Centre. |
| E16. Workers at the Screening Centre will be consistently courteous with the patient and the family. | E16. Workers at the Screening Centre are consistently courteous with the patient and the family. |
| E17. Workers at the Screening Centre will have the knowledge to answer your questions. | E17. Workers at the Screening Centre have the knowledge to answer your questions. |
| **Empathy** (caring and individualised attention that the Screening centre provides to its patients and families) | **Empathy** (caring and individualised attention that the Screening centre provides to its patients and families) |
| E18. The Screening Centre will give you and the patient individual attention. | E18. The Screening Centre gives you and the patient individual attention. |
| E19. The Screening Centre will have operating hours convenient to its patients and families. | E19. The Screening Centre has operating hours convenient to its patients and families. |
| E20. The Screening Centre will have workers who give the patient and the family personal attention. | E20. The Screening Centre has workers who give the patient and the family personal attention. |
| E21. The Screening Centre will have the best interest of the patient and the family at heart. | E21. The Screening Centre has the best interest of the patient and the family at heart. |
| E22. Workers at the Screening Centre will understand the special needs of the patient and the family. | E22. Workers at the Screening Centre understand the special needs of the patient and the family. |

| Table 3 Upper Gastrointestinal Cancer Screening Questionnaire | | |
| --- | --- | --- |
| Measure | Description |  |
| Service Quality | Expectation section | Perception section |
|  | **Tangibles** (physical facilities, equipment and appearance of personnel) | **Tangibles** (physical facilities, equipment and appearance of personnel) |
|  | E1. The Screening Centre will have modern-looking equipment. | P1. The Screening Centre has have modern-looking equipment. |
|  | E2. The Screening Centre‘s physical facilities will be visually appealing. | P2. The Screening Centre‘s physical facilities are visually appealing. |
|  | E3. The Screening Centre‘s workers will be neat-appearing. | P3. The Screening Centre‘s workers are neat-appearing. |
|  | E4. Materials associated with the service will be visually appealing. | P4. Materials associated with the service are visually appealing. |
|  | **Reliability** (ability to perform the promised service dependably and accurately) | **Reliability** (ability to perform the promised service dependably and accurately) |
|  | E5. When the Screening Centre promises to do something by a certain time, it will do so. | P5. When the Screening Centre promises to do something by a certain time, it does so. |
|  | E6. When the patient or you have a problem, the Screening Centre will show a sincere interest in solving it. | P6. When the patient or you have a problem, the Screening Centre shows a sincere interest in solving it. |
|  | E7. The Screening Centre will perform the service right the first time. | P7. The Screening Centre performs the service right the first time. |
|  | E8. The Screening Centre will provide its service at the time it promises to do so. | P8. The Screening Centre provides its service at the time it promises to do so. |
|  | E9. The Screening Centre will insist on error-free records. | P9. The Screening Centre insists on error-free records. |
|  | **Responsiveness** (willingness to help patients and families and provide prompt service) | **Responsiveness** (willingness to help patients and families and provide prompt service) |
|  | E10. Workers at the Screening Centre will tell you exactly when the care will be performed. | P10. Workers at the Screening Centre tell you exactly when the care will be performed. |
|  | E11. Workers at the Screening Centre will give the patient prompt care. | P11. Workers at the Screening Centre give the patient prompt care. |
|  | E12. Workers at the Screening Centre will always be willing to help you and the patient. | P12. Workers at the Screening Centre are always willing to help you and the patient. |
|  | E13. Workers at the Screening Centre will never be too busy to respond to the patient’s or your requests. | P13. Workers at the Screening Centre are never too busy to respond to the patient’s or your requests. |
|  | **Assurance** (including competence, courtesy, credibility and security) | **Assurance** (including competence, courtesy, credibility and security) |
|  | E14. The behavior of the workers at the ICU will instill confidence in the patient and the family. | P14. The behavior of the workers at the ICU instills confidence in the patient and the family. |
|  | E15. You will feel safe for the patient’s care by the Screening Centre. | P15. You feel safe for the patient’s care by the Screening Centre. |
|  | E16. Workers at the Screening Centre will be consistently courteous with the patient and the family. | P16. Workers at the Screening Centre are consistently courteous with the patient and the family. |
|  | E17. Workers at the Screening Centre will have the knowledge to answer your questions. | P17. Workers at the Screening Centre have the knowledge to answer your questions. |
|  | **Empathy** (caring and individualised attention that the Screening centre provides to its patients and families) | **Empathy** (caring and individualised attention that the Screening centre provides to its patients and families) |
|  | E18. The Screening Centre will give you and the patient individual attention. | P18. The Screening Centre gives you and the patient individual attention. |
|  | E19. The Screening Centre will have operating hours convenient to its patients and families. | P19. The Screening Centre has operating hours convenient to its patients and families. |
|  | E20. The Screening Centre will have workers who give the patient and the family personal attention. | P20. The Screening Centre has workers who give the patient and the family personal attention. |
|  | E21. The Screening Centre will have the best interest of the patient and the family at heart. | P21. The Screening Centre has the best interest of the patient and the family at heart. |
|  | E22. Workers at the Screening Centre will understand the special needs of the patient and the family. | P22. Workers at the Screening Centre understand the special needs of the patient and the family. |
| Satisfaction | SAT1. I am satisfied with the screening service I received in this screening centre. | |
|  | SAT2. My decision to visit this screening centre has been a wise one. | |
|  | SAT3. The screening services I received corresponded to my current needs. | |
| Behavioural intention | BI1. I will recommend other people to use the screening  services offered by this screening centre. | |
|  | BI2. I will consider this screening centre my first choice if I need  medical services in the future. | |
|  | BI3. I will tell other people good things about screening centre. | |
| Discomfort | DIS13. The physician was [not] too rough when performing the screening. | |
|  | DIS14. I [did not have] a lot of pain during the procedure. | |
|  | DIS15. The procedure was more comfortable than I expected. | |
|  | DIS16. I was [not] embarrassed by the procedure. | |
| Baseline characteristics | BC1. Gender: 1. Male; 2. Female | |
|  | BC2. Age: | |
|  | BC3. Marital status: 1: Never married; 2: Married; 3: Separated (separated due to relationship discord); 4: Divorced; 5: Widowed | |
|  | BC4. Highest Educational Degree: 1: No formal schooling; 2: Primary school; 3: Junior high school; 4: Senior high school (including secondary/technical school); 5: College; 6: Undergraduate; 7: Postgraduate and above; 99: Not available | |
|  | BC5. Occupatipn: 1: Agricultural, forestry, livestock and fishery workers; 2: Workers; 3: Administrative and managerial staff; 4: Professional and technical staff (doctors, teachers, scientists); 5: Sales and service workers; 6: Domestic work; 7: Private owners; 8: Leaving/retired; 9: Non-working/lay-off; 10: Other or not easily classified; | |
|  | BC6. Residence: 1: Rural; 2: Urban | |
|  | BC7. Average annual household income (Yuan): 1: less than 10,000; 2: 1,000 ~ 29,000; 3: 3,000 ~ 49,000; 4: 5,000 ~ 69,000; 5: 7,000 ~ 89,000; 6: 9,000 ~ 109,000; 7: 11,000 ~ 199,000; 8: 200,000 and above | |
|  | BC8. Health self-assessment：1.Very good; 2.Better; 3. General; 4. Poor | |
|  | BC9. I was very anxious about having the procedure: 1.Yes; 2. No | |
|  | BC10. Experience with endoscopy before: 1.Yes; 2. No |  |
|  | BC11. Time taken from home to our screening centre (minute): 1.Less than 30; 2. 30-60; 3. 60 and above | |
|  | BC12. Purpose of participating in the screening: 1.Medical check-ups without disease; 2. Disease review | |
|  | BC13. Experience of examination/visit at this Hospital before: 1.Yes; 2. No | |
|  | B14. Do you have any common chronic diseases (hypertension, diabetes or hyperlipidemia) ?: 1.Yes; 2. No | |
